# Supplementary material for: Investigation of Anticancer Properties of Monoterpene-Aminopyrimidine Hybrids on A2780 Ovarian Cancer Cells
Source: MDPI journal article supplement (doi:10.3390/ijms241310581), 2023-06-24
Supplement: s1 [file s1]

## Supporting information

### Investigation of anticancer properties of monoterpene-aminopyrimidine hybrids on A2780 ovarian cancer cells

Viktória Nagy, Raji Mounir, Gábor J. Szebeni, Zsolt Szakonyi, Nikolett Gémes, Renáta Minorics, Péter Germán and István Zupkó

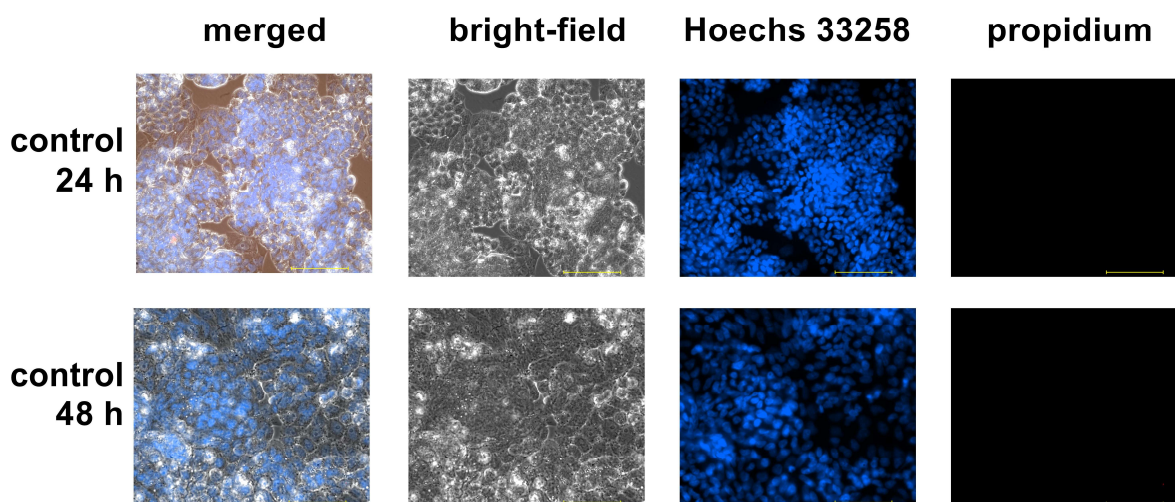

**Figure S1.** Control (untreated) A2780 cells after 24 or 48 h incubation. The bar in the pictures indicates 100  $\mu\text{m}$ .

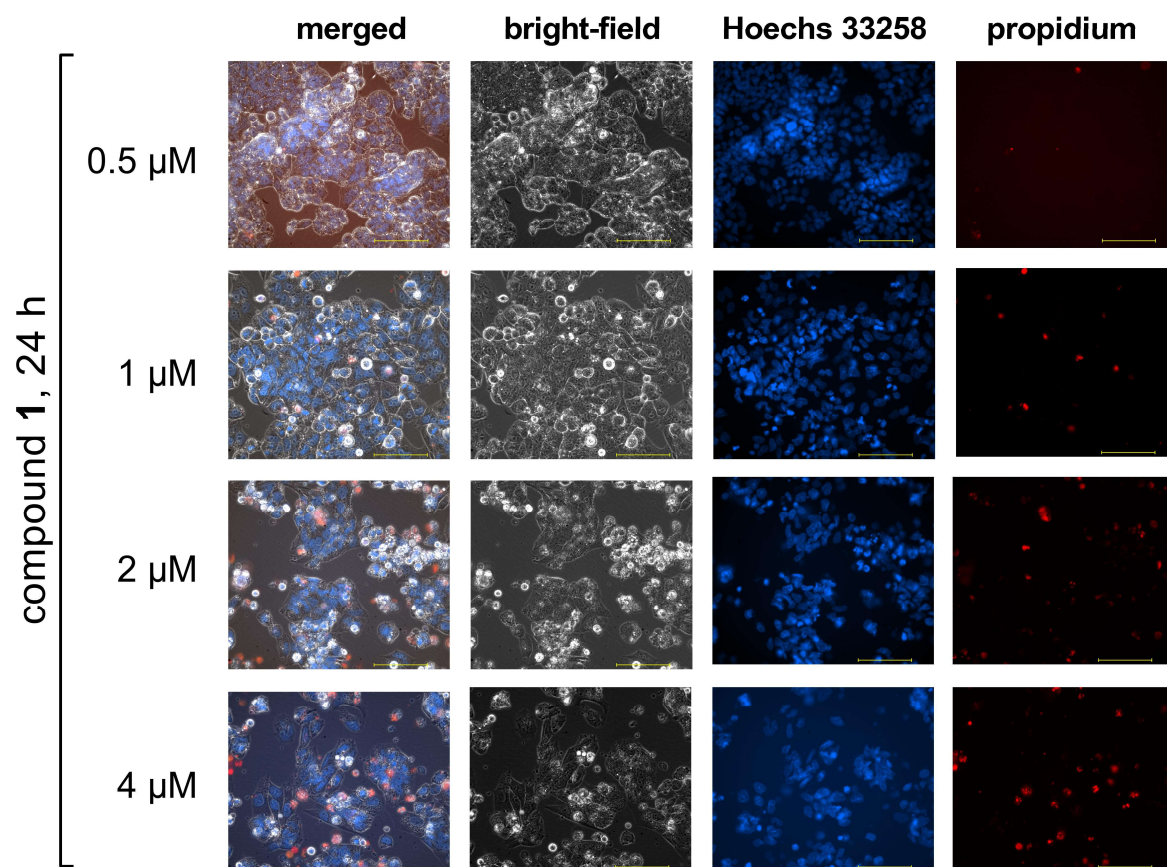

**Figure S2.** A2780 cells treated with compound **1** for 24 h. The bar in the pictures indicates 100  $\mu$ m.

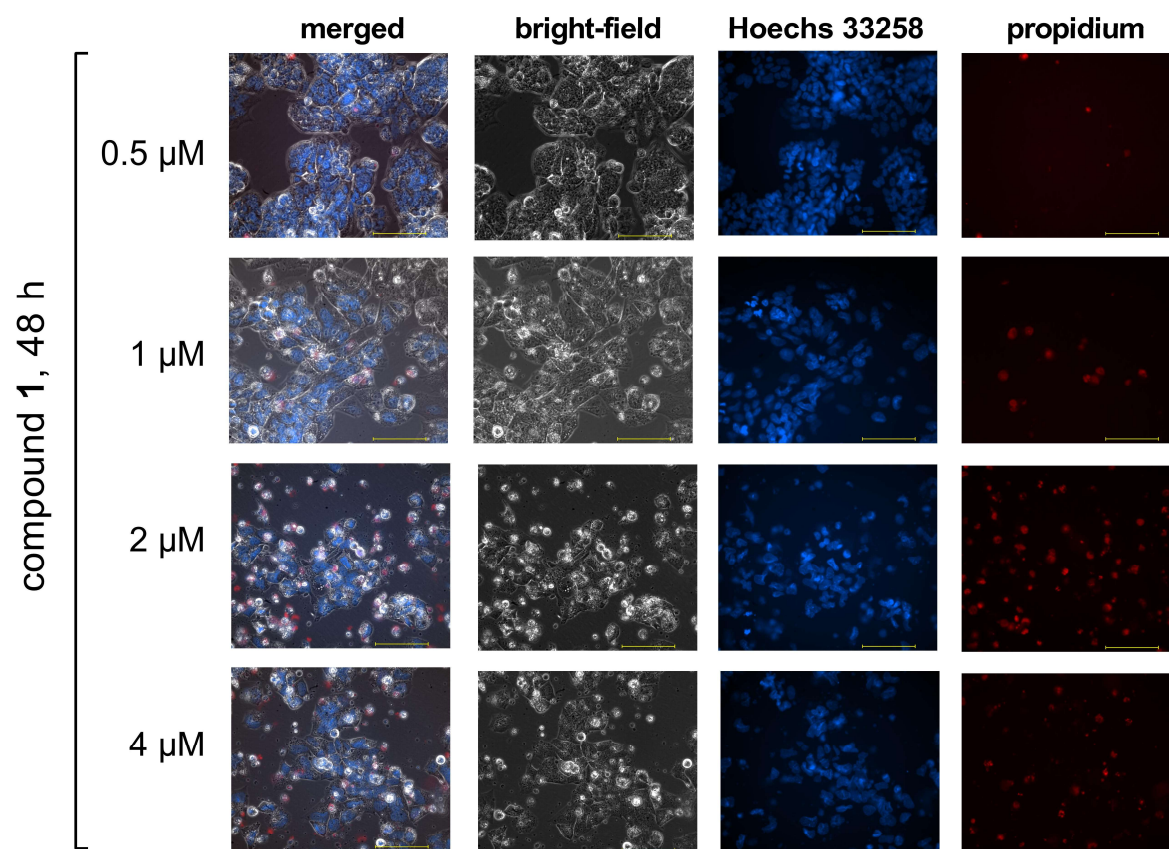

**Figure S3.** A2780 cells treated with compound **1** for 48 h. The bar in the pictures indicates 100  $\mu$ m.

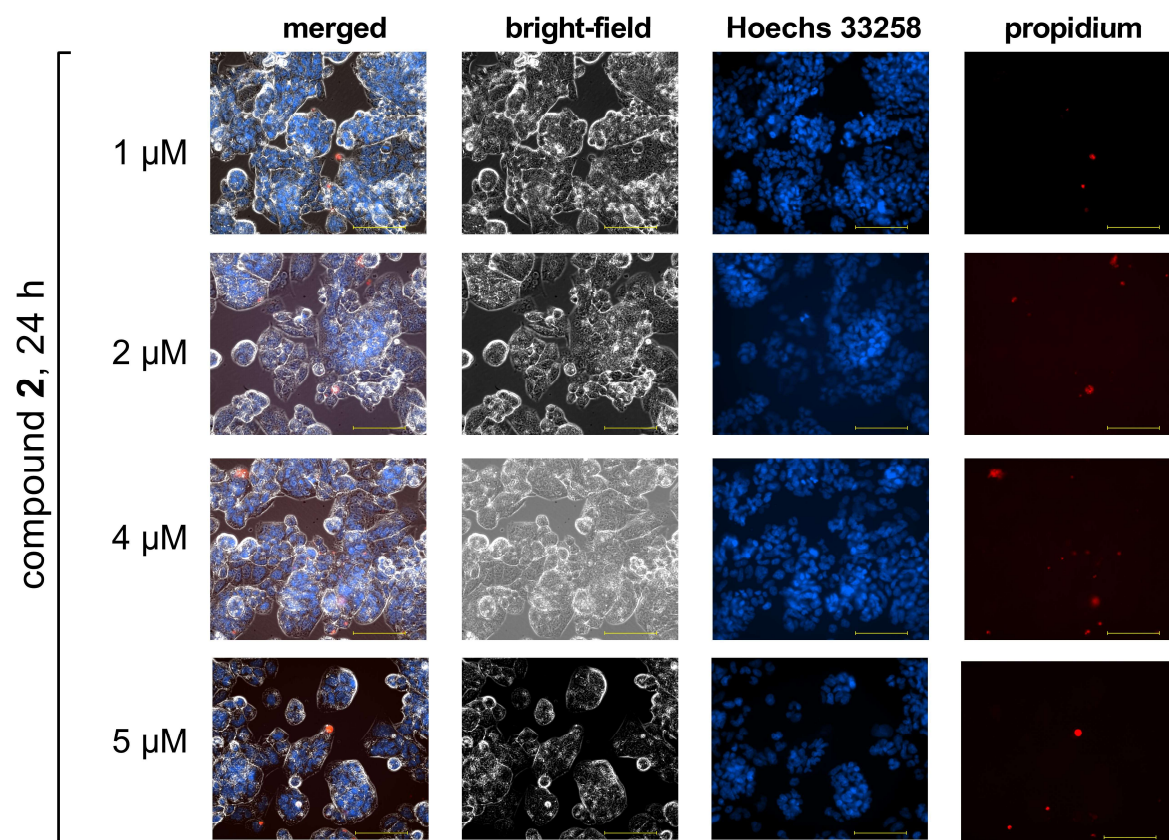

**Figure S4.** A2780 cells treated with compound 2 for 24 h. The bar in the pictures indicates 100  $\mu$ m.



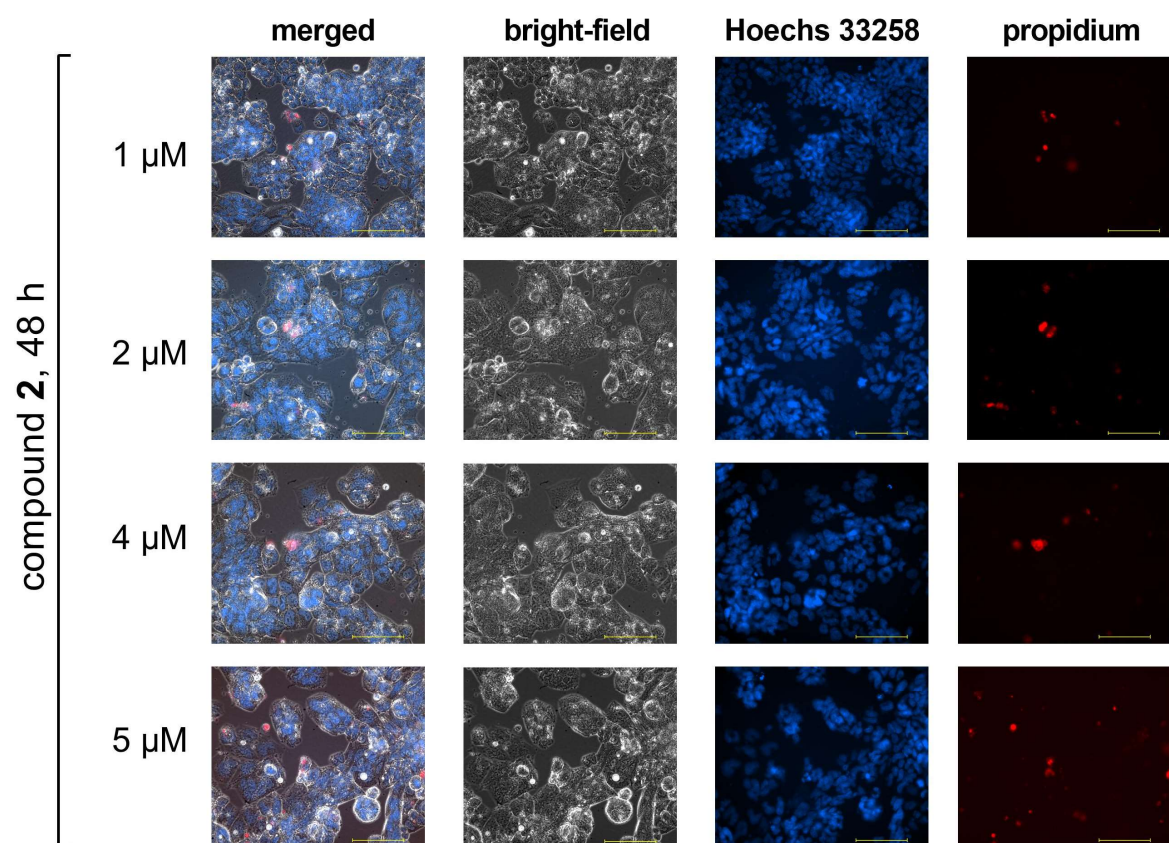

**Figure S5.** A2780 cells treated with compound 2 for 48 h. The bar in the pictures indicates 100  $\mu$ m.
